# Supplementary material
Source: PubMed Central journal article supplement (PMC4939379)
Supplement: Supp_Table.pdf [file Supp_Table.pdf]

## Supplementary Data

SUPPLEMENTARY TABLE S1. DISTRIBUTION OF OUTCOMES IN THE TREATED GROUP ACCORDING TO TSH LEVELS DURING THE SECOND HALF OF PREGNANCY<sup>a</sup>

| <i>Maternal outcomes, n (%)</i> | <i>LT4 group with TSH at goal, n=50</i> | <i>LT4 group with TSH not at goal, n=12</i> | <i>p-Value unadjusted</i> |
|---------------------------------|-----------------------------------------|---------------------------------------------|---------------------------|
| Pregnancy loss                  | 0 (0)                                   | 0 (0)                                       | 0.99                      |
| Preterm delivery (<37 weeks)    | 2 (4)                                   | 2 (16.7)                                    | 0.17                      |
| Gestational diabetes            | 1 (2)                                   | 1 (8.3)                                     | 0.35                      |
| Gestational hypertension        | 5 (10)                                  | 2 (16.7)                                    | 0.61                      |
| Pre-eclampsia                   | 2 (4)                                   | 0 (0)                                       | 0.99                      |
| Premature rupture of membranes  | 6 (12)                                  | 1 (8.3)                                     | 0.99                      |
| Intrauterine growth restriction | 1 (2)                                   | 0 (0)                                       | 0.99                      |
| Placenta previa                 | 0 (0)                                   | 0 (0)                                       | 0.99                      |
| Placenta abruption              | 0 (0)                                   | 0 (0)                                       | 0.99                      |
| <i>Neonatal outcomes, n (%)</i> |                                         |                                             |                           |
| NICU admission                  | 1 (2)                                   | 1 (8.3)                                     | 0.36                      |
| Birth weight < 2500 g           | 0 (0)                                   | 1 (8.3)                                     | 0.19                      |
| 5-minute Apgar ≤ 7              | 0 (0)                                   | 0 (0)                                       | 0.99                      |
| Congenital malformations        | 0 (0)                                   | 0 (0)                                       | 0.99                      |
| Neonatal death                  | 0 (0)                                   | 0 (0)                                       | 0.99                      |

<sup>a</sup>Out of the 82 treated pregnant women, 72 had a TSH level checked in the second half of the pregnancy (>20th gestational week); 50 had TSH valued ≤ 3 mIU/L (at goal) at all checks, 12 had TSH values >3 mIU/L at all checks, and 10 had TSH values fluctuating in and out of goal (excluded from this analysis).
